# Supplementary material for: Candidate proteins from predegenerated nerve exert time-specific protection of retinal ganglion cells in glaucoma
Source: PubMed Central journal article supplement (PMC5673995; doi:10.1038/s41598-017-14860-5), 2017-11-06
Supplement: 41598_2017_14860_MOESM3_ESM.pdf [file 41598_2017_14860_MOESM3_ESM.pdf]

**Candidate proteins from predegenerated nerve exert time-specific  
protection of retinal ganglion cells in glaucoma**

Marita Pietrucha-Dutczak<sup>1\*</sup>, Adrian Smedowski<sup>1\*</sup>, Xiaonan Liu<sup>2</sup>, Iwona Matuszek<sup>1</sup>, Markku Varjosalo<sup>2</sup> and Joanna Lewin-Kowalik<sup>1</sup>

**Supplementary table 1.** Protein list identified in Mass Spectrometry.

**Supplementary table 2.** GOrilla gene ontology enrichment analysis for biological process and molecular function with marked p values.
